# Supplementary material
Source: HighWire-hosted journal article supplement (https://bmjopen.bmj.com/content/8/1/e019198)
Supplement: inline-supplementary-material-1 [file inline-supplementary-material-1.pdf]

## Appendix 1. Search strategy for OVID version of Medline

1. RoboticSurgical Procedures/
2. ("roboticsurgery" or "roboticsurgeries" or "robot surgery" or "roboticsurgical").mp.
3. 1 or 2
4. (transoral or trans-oral or "trans oral" or tors).mp.
5. exp Oropharyngeal Neoplasms/
6. ((oropharyngeal or oro-pharyngeal or tonsil\* or "tongue base") and (cancer\$ or neoplasm\$ or carcinoma\$ or tumor\$)).mp.
7. 5 or 6
8. 3 and 4 and 7
9. RoboticSurgical Procedures/
10. ("roboticsurgery" or "roboticsurgeries" or "robot surgery" or "roboticsurgical").mp.
11. 9 or 10
12. (transoral or trans-oral or "trans oral" or tors).mp.
13. exp Oropharyngeal Neoplasms/
14. ((oropharyngeal or oro-pharyngeal or tonsil\* or "tongue base") and (cancer\$ or neoplasm\$ or carcinoma\$ or tumor\$)).mp.
15. 13 or 14
16. 11 and 12 and 15
17. Sleep Apnea, Obstructive/su [Surgery]
18. 17 and 3
19. 18 or 16
